# Supplementary material for: Oligomer formation of a tea polyphenol, EGCG, on its sensing molecule 67 kDa laminin receptor
Source: Royal Society of Chemistry journal article supplement (doi:10.1039/c6cc09504f), 2017-01-01
Supplement: c6cc09504f1.pdf [file c6cc09504f1.pdf]

**A**

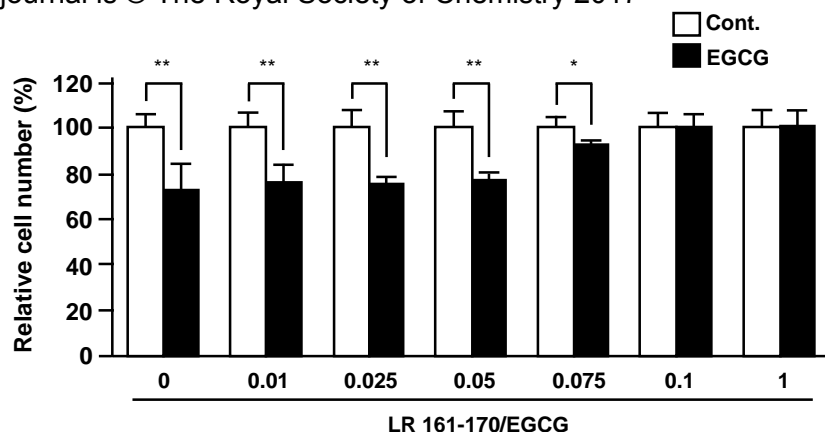

**B**

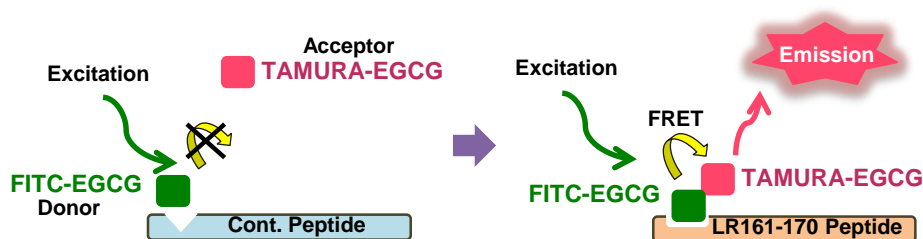

**C**

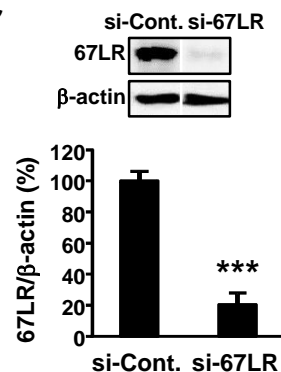

**Fig.S1 EGCG binds to 67LR as an oligomer form.**

**A.** The neutralising activity of LR 161-170 on the EGCG-induced inhibition of cancer cell growth. EGCG plus peptide (closed bar) are shown as the cell number relative to EGCG-nontreated control (open bar). Data, means  $\pm$  S.D. ( $n = 3$ ). \*,  $p < 0.05$ , \*\*,  $p < 0.01$ . **B.** The illustration of FRET system. **C.** The expression of 67LR on si-Cont. or si-67LR transfected HEK293 cells.
